# Supplementary material for: Gas exchange and leaf anatomy of a C3–CAM hybrid, Yucca gloriosa (Asparagaceae)
Source: PubMed Central journal article supplement (PMC4762382; doi:10.1093/jxb/erv536), 2015-12-29
Supplement: supp_erv536_Supplementary_tables_S1_S3_figures_S1_S6.pdf [file supp_erv536_Supplementary_tables_S1_S3_figures_S1_S6.pdf]

Gas exchange and leaf anatomy of a C<sub>3</sub>-CAM hybrid, *Yucca gloriosa* (Asparagaceae)

Karolina Heyduk, Nia Burrell, Falak Lalani, Jim Leebens-Mack

**Table S1** – locality information for each genotype used in this study. Latitude and longitude reported in decimal degrees. States: NC = North Carolina, SC = South Carolina, GA = Georgia. Those designated with \* were used for gas exchange measurement, and “GC block” indicates what date the clones were in the growth chamber.

| Species                 | Genotype ID | GC block  | State | Lat      | Lon       |
|-------------------------|-------------|-----------|-------|----------|-----------|
| <i>Y. aloifolia</i> *   | 6           | July 2014 | SC    | 33.64912 | -78.92852 |
| <i>Y. aloifolia</i> *   | 7           | July 2014 | SC    | 33.6501  | -78.9256  |
| <i>Y. aloifolia</i> *   | 23          | Feb 2015  | GA    | 33.92746 | -83.37906 |
| <i>Y. aloifolia</i>     | 24          | NA        | GA    | 33.94787 | -83.4092  |
| <i>Y. filamentosa</i>   | 1           | NA        | NC    | 35.95847 | -75.63843 |
| <i>Y. filamentosa</i> * | 2           | Oct 2014  | NC    | 35.95818 | -75.63808 |
| <i>Y. filamentosa</i>   | 4           | NA        | NC    | 35.96482 | -75.63393 |
| <i>Y. filamentosa</i> * | 9           | Oct 2014  | SC    | 33.5044  | -79.06227 |
| <i>Y. filamentosa</i>   | 22          | NA        | GA    | 33.90708 | -83.34247 |
| <i>Y. filamentosa</i> * | 27          | Feb 2015  | GA    | 33.92129 | -83.39032 |
| <i>Y. filamentosa</i> * | 30          | July 2014 | GA    | 33.93197 | -83.33298 |
| <i>Y. gloriosa</i> *    | 1           | Feb 2015  | GA    | 31.14714 | -81.36619 |
| <i>Y. gloriosa</i> *    | 2           | Oct 2014  | GA    | 31.14633 | -91.3664  |
| <i>Y. gloriosa</i> *    | 12          | July 2014 | SC    | 33.50278 | -79.06448 |
| <i>Y. gloriosa</i> *    | 13          | Feb 2015  | SC    | 32.50592 | -80.2931  |
| <i>Y. gloriosa</i> *    | 14          | Oct 2014  | SC    | 32.50398 | -80.29545 |
| <i>Y. gloriosa</i>      | 15          | NA        | SC    | 32.50393 | -80.2957  |
| <i>Y. gloriosa</i> *    | 17          | July 2014 | SC    | 32.39087 | -80.43033 |
| <i>Y. gloriosa</i> *    | 18          | Oct 2014  | GA    | 31.11907 | -81.40818 |
| <i>Y. gloriosa</i> *    | 19          | Oct 2014  | GA    | 31.02172 | -81.4348  |
| <i>Y. gloriosa</i> *    | 20          | Feb 2015  | GA    | 31.14895 | -81.36608 |

**Table S2** – Table of microsatellite primer sequences and repeat motif/length. Source indicates where the primers were derived from: 2011 indicates a source of Flatz et. al 2011, *de novo* is a new SSR developed for this study, and 2012 is from Rentsch and Leebens-Mack 2012.

| Name                           | Source         | Sequence                                         | Motif  | Length  |
|--------------------------------|----------------|--------------------------------------------------|--------|---------|
| Yb12-forward<br>Yb12-reverse   | 2011           | AACTCCCGTGTTTTGGTGTG<br>AACTCTACTGCCATGTATGTACGC | TACA   | 124-132 |
| Yb04-forward<br>Yb04-reverse   | 2011           | GCGCATTTTTGTTATTCTATGC<br>TCAGCAGCAACCGACAATAG   | CT/GT  | 162-184 |
| 36-forward<br>36-reverse       | 2011           | TACCCGTTCTTGCGGATAGT<br>GCTGAGTTCATCGTCGTCCT     | CT     | 165-179 |
| 34690-forward<br>34690-reverse | <i>de novo</i> | CTGAGTGTGCTACACTTTTCC<br>CGTAAACATGATTTCTCATCC   | CTTCAC | 167-173 |
| 24908-forward<br>24908-reverse | <i>de novo</i> | GACGTAGCTGTCACAGATGTT<br>TTTCTTCGTTTCGTTAACTTG   | CT     | 159-165 |
| 13-forward<br>13-reverse       | 2012           | TTACCGAAGCCAGCTCTGC<br>GGAGTGAGAGAGGGAGTGG       | AG     | 234-243 |
| 1-forward<br>1-reverse         | 2012           | CCGACTTCCACCGAACTTG<br>AGACCCAGCGATGATGGAG       | CAG    | 181-201 |

**Table S3** – Soil moisture probe measures for % soil water content, taken every other day prior to first LiCor measurement with a soil moisture probe. Plants are indicated by species identifiers (“YA” = *Y. aloifolia*, “YF” = *Y. filamentosa*, and “YG” = *Y. gloriosa*) as well as their genotype designation (number/letter). Grey shaded rows are plants that were assigned to the drought stress treatment.

| Plant  | Day1 | Day3 | Day5 | Day7 | Day9 |
|--------|------|------|------|------|------|
| YA6.1  | 20.2 | 15.6 | 6.3  | 6.4  | 11.7 |
| YA6.2  | 17.5 | 28.3 | 20.4 | 17.2 | 15.8 |
| YA7.1  | 6.1  | 13.3 | 13.8 | 15.3 | 15.5 |
| YA7.2  | 14.2 | 12.9 | 6.0  | 3.5  | 8.6  |
| YA23.1 | 9.9  | 8.4  | 11.0 | 10.8 | 12.6 |
| YA23.2 | 14.7 | 14.8 | 10.5 | 5.6  | 5.6  |
| YF2.1  | 5.9  | 1.9  | 0.2  | 0    | 12.1 |
| YF2.2  | 7.9  | 14.5 | 14.2 | 11   | 13.7 |
| YF9.1  | 14.1 | 10.4 | 5.1  | 0.7  | 15.4 |
| YF9.2  | 9.0  | 15.2 | 16.4 | 14.8 | 17.6 |
| YF27.1 | 8.7  | 8.6  | 14.3 | 14.7 | 14.3 |
| YF27.2 | 6.9  | 6.4  | 2.6  | 0    | 14.9 |
| YF30.1 | 17.8 | 5.4  | 4.5  | 0.7  | 19.5 |
| YF30.2 | 24.7 | 20.1 | 20.4 | 21.5 | 19.4 |
| YG1A   | 12.5 | 9.5  | 25.1 | 16.9 | 19.7 |
| YG1B   | 13.5 | 7.0  | 3.3  | 5.0  | 13.6 |
| YG2A   | 12.3 | 7.4  | 2.1  | 0    | 17.2 |
| YG2B   | 8.4  | 17.6 | 24.3 | 20.1 | 17.2 |
| YG12.1 | 15.5 | 10.9 | 10.3 | 15.2 | 18.6 |
| YG12.2 | 14.4 | 12.5 | 2.8  | 0    | 12.9 |
| YG13.1 | 10.0 | 14.2 | 23.9 | 15.1 | 19.5 |
| YG13.2 | 8.7  | 7.5  | 3.1  | 1.8  | 11.0 |
| YG14.1 | 7.7  | 7.4  | 3.2  | 0    | 9.9  |
| YG14.2 | 11.6 | 7.3  | 11.9 | 14.7 | 13.8 |
| YG17.1 | 5.4  | 1.4  | 2.3  | 0.7  | 8.4  |
| YG17.2 | 14.2 | 17   | 16   | 14.7 | 13.2 |
| YG18.1 | 11.5 | 6.7  | 0.4  | 0    | 12.7 |
| YG18.2 | 10.4 | 13.4 | 14.8 | 12.5 | 15.7 |
| YG19.1 | 7.6  | 3.5  | 2.6  | 0.6  | 10.4 |
| YG19.2 | 5.1  | 10.2 | 10.5 | 14.2 | 15.7 |
| YG20.1 | 7.0  | 4.3  | 0.9  | 3.8  | 14.1 |
| YG20.2 | 7.1  | 10.5 | 16.0 | 9.1  | 12.6 |

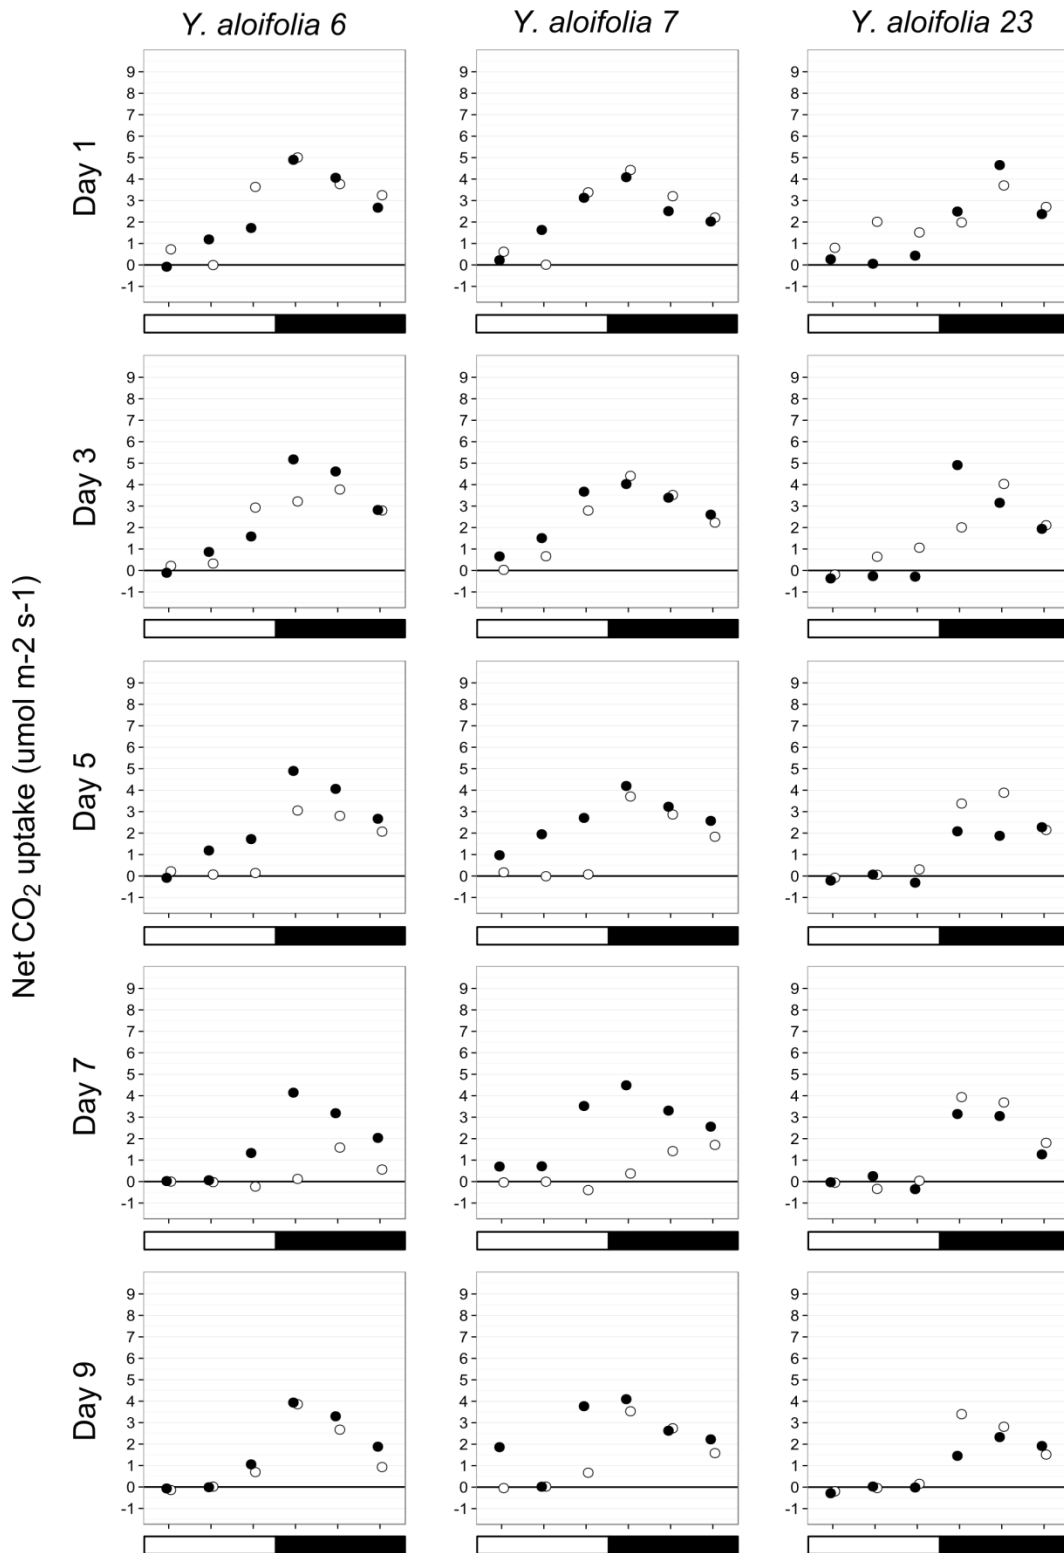

**Figure S1** – Individual genotype gas exchange curves for the 3 samples of *Y. aloifolia*. Filled circles indicate the clone kept under well watered conditions, open circles indicate clones which were subjected to dry down starting after Day 1. The open bar indicates hours under light, the filled bar indicates time when lights were off.

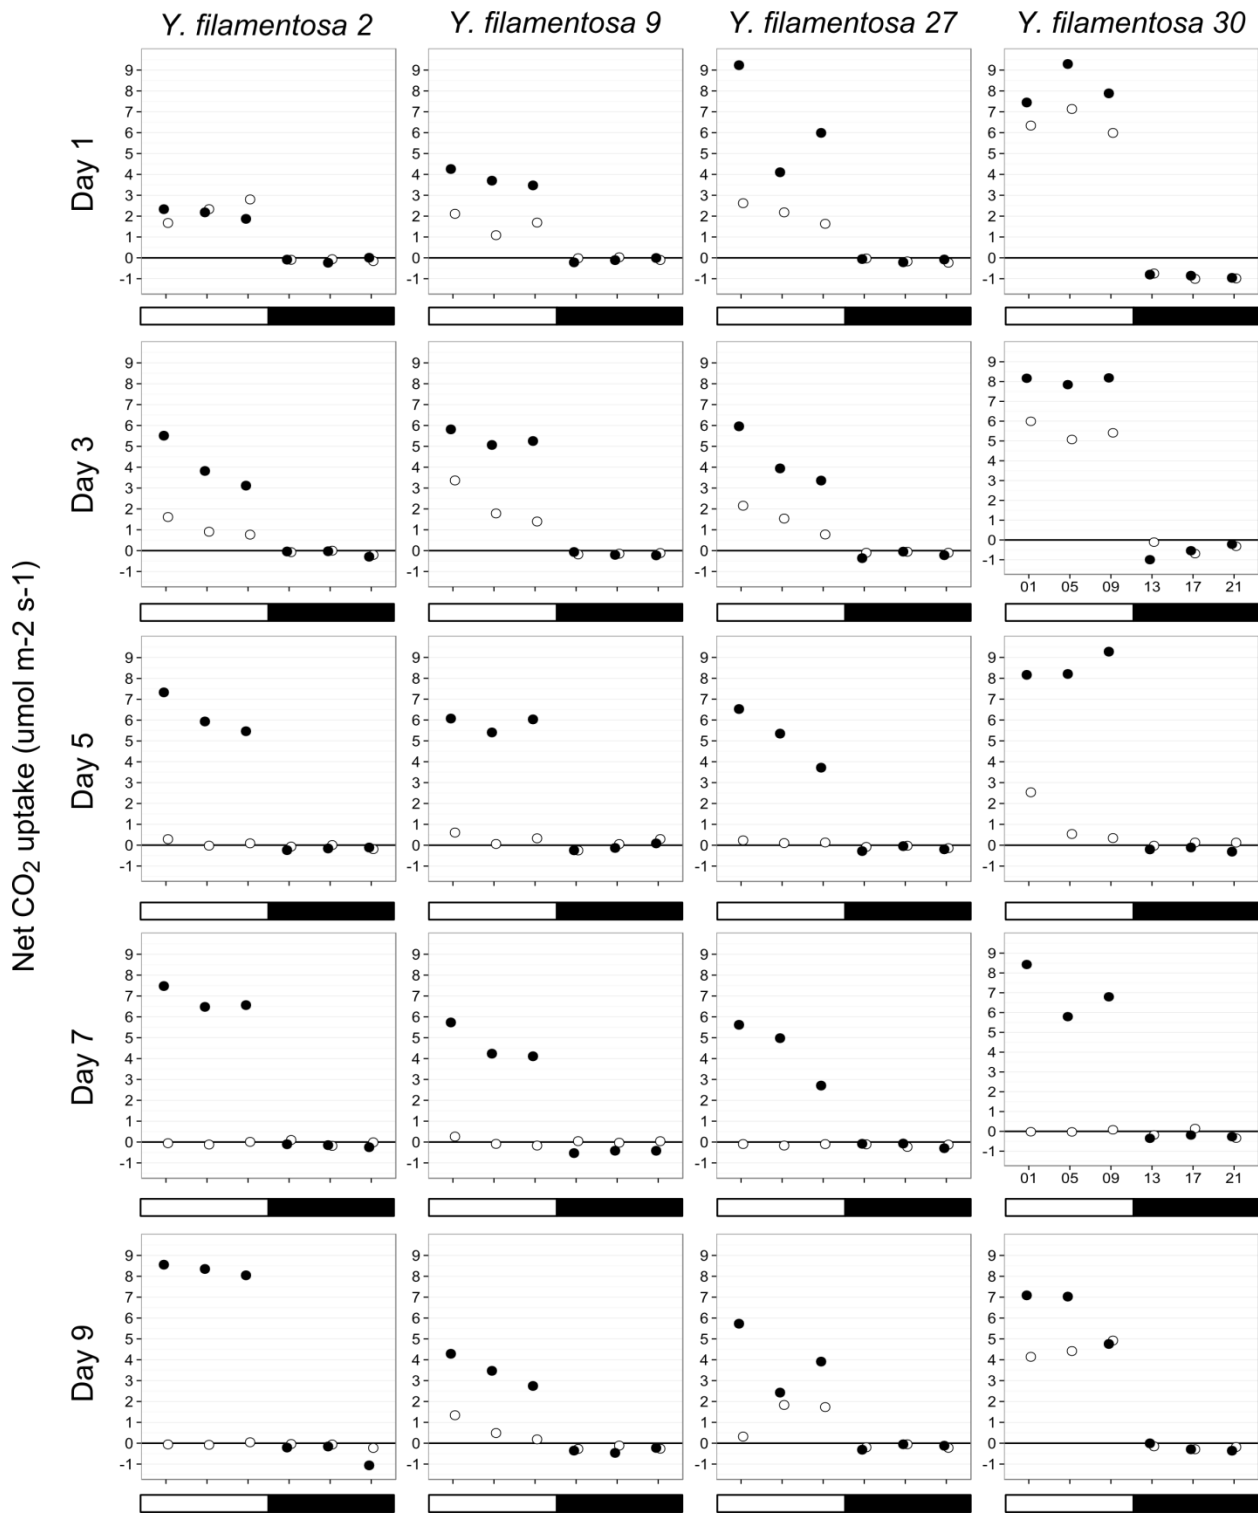

**Figure S2** – Individual genotype gas exchange curves for the 4 samples of *Y. filamentosa*. Filled circles indicate the clone kept under well watered conditions, open circles indicate clones which were subjected to dry down starting after Day 1. The open bar indicates hours under light, the filled bar indicates time when lights were off.

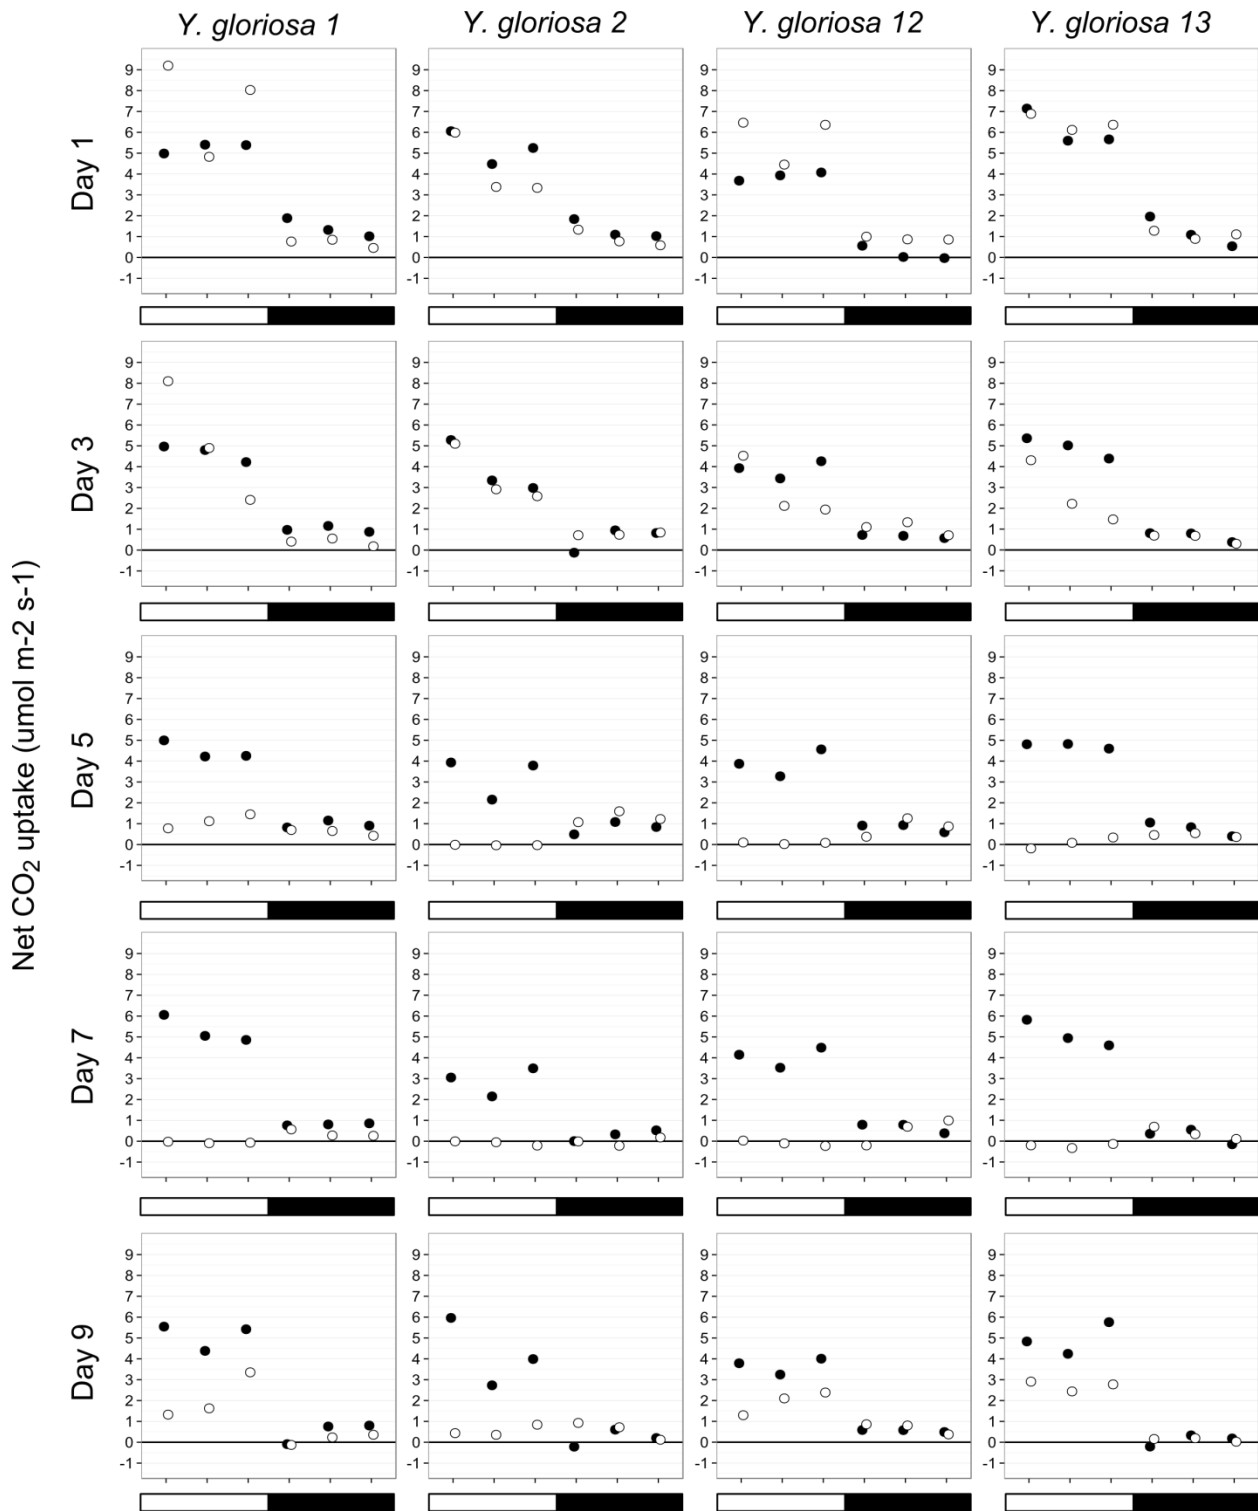

**Figure S3** – Individual genotype gas exchange curves for the 9 samples of *Y. gloriosa*, divided into three panels. Filled circles indicate the clone kept under well watered conditions, open circles indicate clones which were subjected to dry down starting after Day 1. The open bar indicates hours under light, the filled bar indicates time when lights were off.

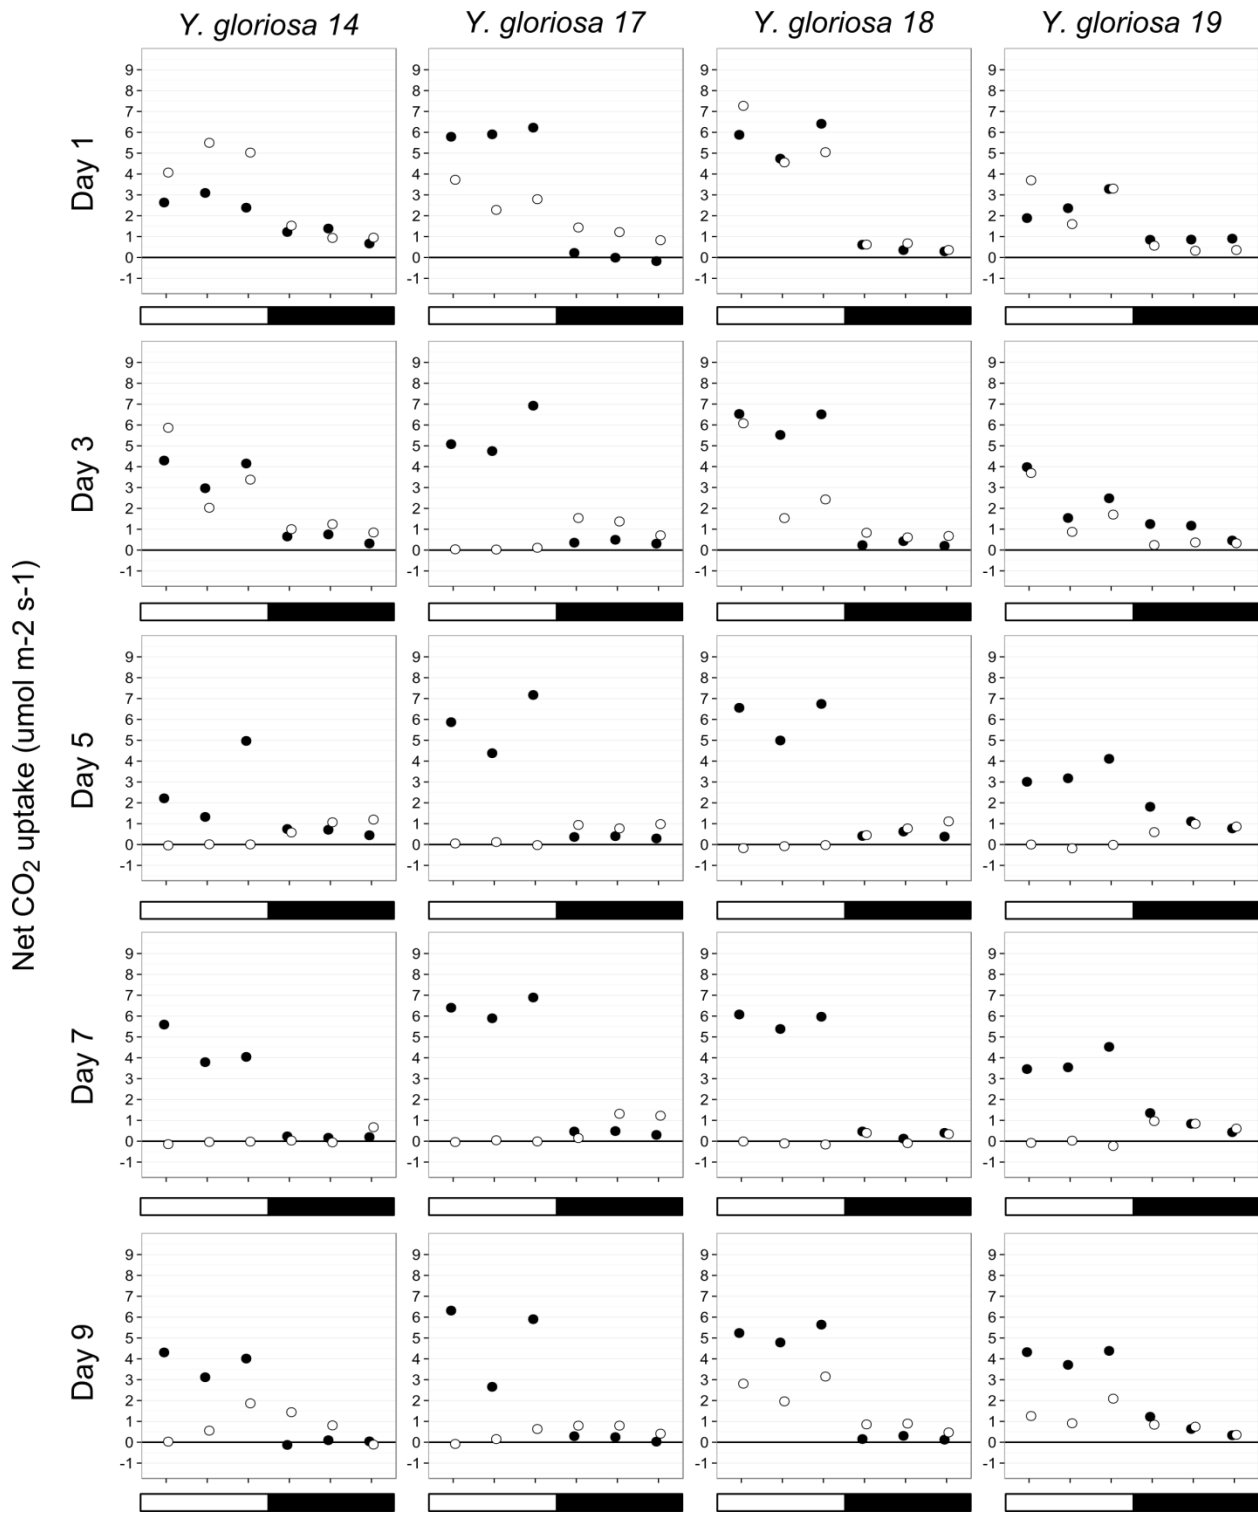

**Figure S3** – Individual genotype gas exchange curves for the 9 samples of *Y. gloriosa*, divided into three panels. Filled circles indicate the clone kept under well watered conditions, open circles indicate clones which were subjected to dry down starting after Day 1. The open bar indicates hours under light, the filled bar indicates time when lights were off.

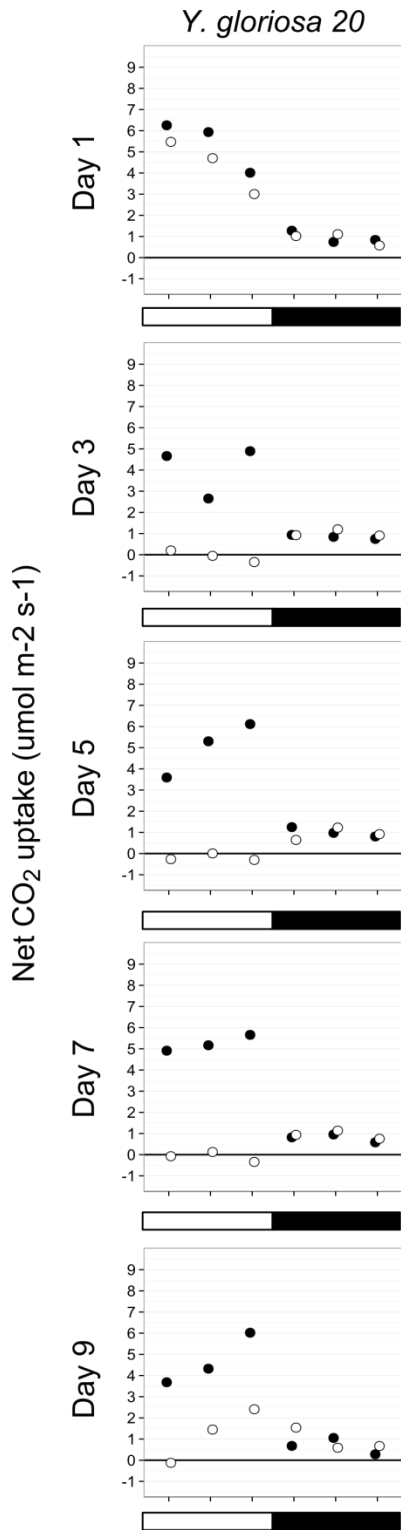

**Figure S3** – Individual genotype gas exchange curves for the 9 samples of *Y. gloriosa*, divided into three panels. Filled circles indicate the clone kept under well watered conditions, open circles indicate clones which were subjected to dry down starting after Day 1. The open bar indicates hours under light, the filled bar indicates time when lights were off.



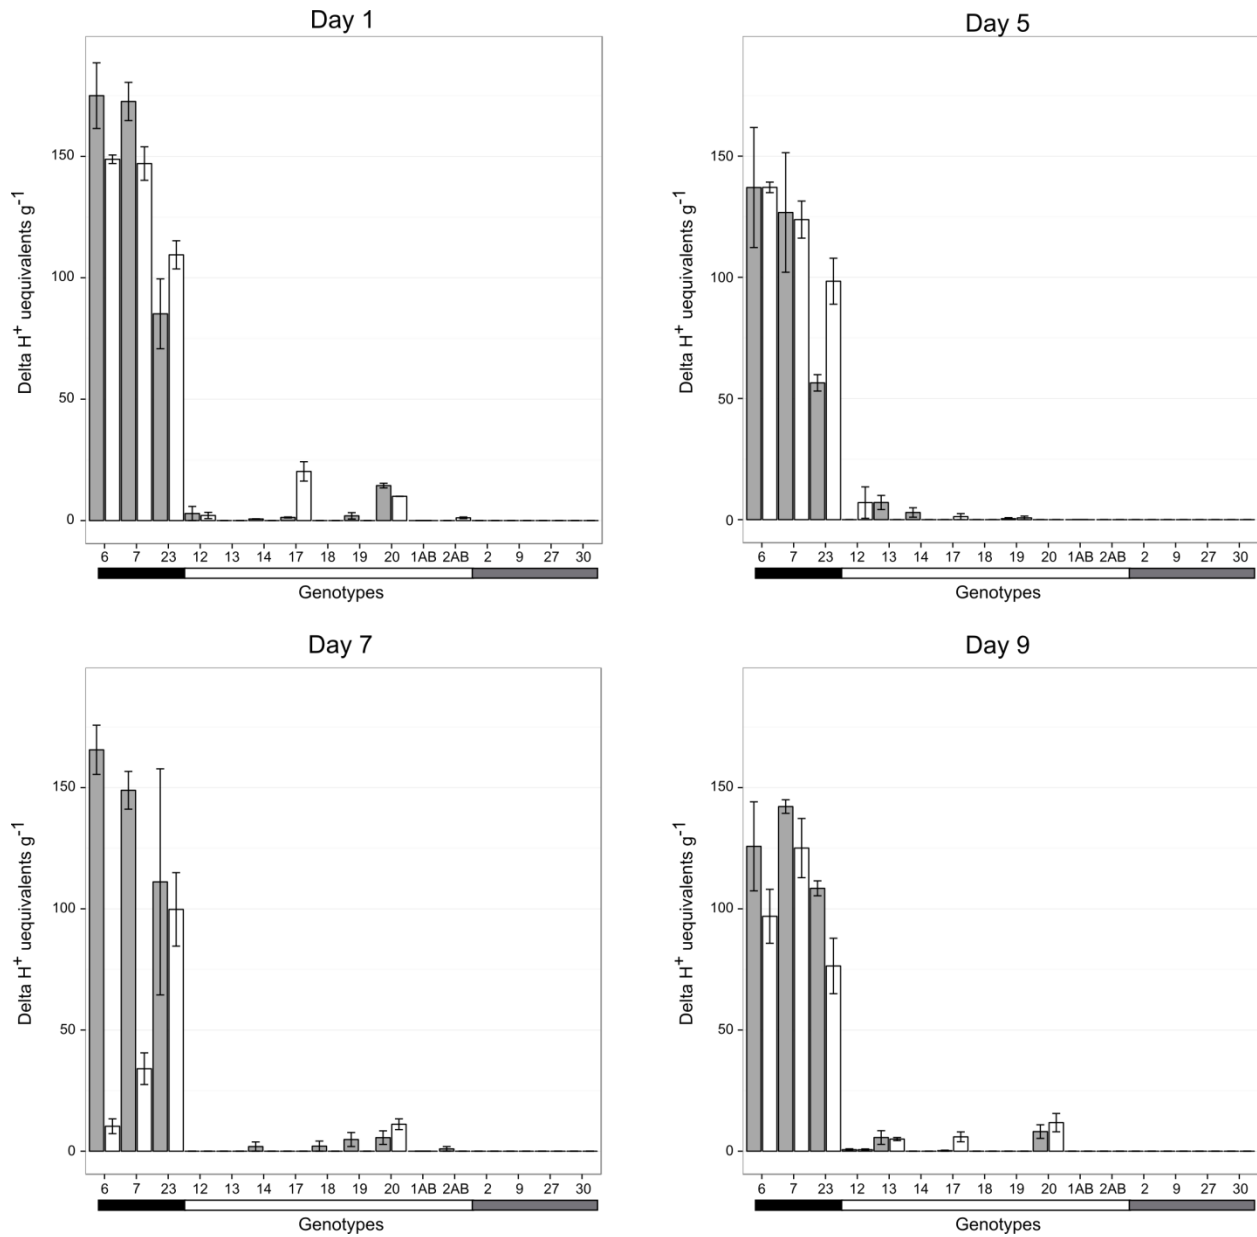

**Figure S4** – Genotypic deltaH<sup>+</sup> (H<sup>+</sup> uequivalents AM – H<sup>+</sup> uequivalents PM, per gram of tissue) values across the four days measured. Black line under genotypes are *Y. aloifolia*, open bar is *Y. gloriosa*, and grey bar indicates genotypes of *Y. filamentosa*. Grey vertical bars indicate measurements from watered plants (except day 1, where all plants were well-watered), open bars indicate plants in the drought treatment. Standard error reported with error bars.

**Figure S5** – Raw Spearman correlation coefficients.

|                                           | Succulence | Adaxial stomata | Abaxial stomata | Leaf thickness | IAS   | Avg. dist. Major vein | Avg. dist minor vein | Max. dark CO <sub>2</sub> | Max. light CO <sub>2</sub> | Proportion dark CO <sub>2</sub> (watered) | Proportion dark CO <sub>2</sub> (watered) | deltaH+ (w) | deltaH+ (d) | Avg. cell size adaxial | Avg. cell size abaxial |
|-------------------------------------------|------------|-----------------|-----------------|----------------|-------|-----------------------|----------------------|---------------------------|----------------------------|-------------------------------------------|-------------------------------------------|-------------|-------------|------------------------|------------------------|
| Succulence                                |            |                 |                 |                |       |                       |                      |                           |                            |                                           |                                           |             |             |                        |                        |
| Adaxial stomata                           | -0.57      |                 |                 |                |       |                       |                      |                           |                            |                                           |                                           |             |             |                        |                        |
| Abaxial stomata                           | -0.55      | 0.63            |                 |                |       |                       |                      |                           |                            |                                           |                                           |             |             |                        |                        |
| Leaf thickness                            | 0.68       | -0.49           | -0.29           |                |       |                       |                      |                           |                            |                                           |                                           |             |             |                        |                        |
| IAS                                       | -0.41      | 0.21            | 0.00            | -0.69          |       |                       |                      |                           |                            |                                           |                                           |             |             |                        |                        |
| Avg. dist. major vein                     | 0.61       | -0.74           | -0.43           | 0.37           | -0.34 |                       |                      |                           |                            |                                           |                                           |             |             |                        |                        |
| Avg. dist minor vein                      | 0.55       | -0.30           | -0.23           | 0.58           | -0.43 | 0.27                  |                      |                           |                            |                                           |                                           |             |             |                        |                        |
| Max. dark CO <sub>2</sub>                 | 0.67       | -0.46           | -0.26           | 0.89           | -0.78 | 0.47                  | 0.58                 |                           |                            |                                           |                                           |             |             |                        |                        |
| Max light CO <sub>2</sub>                 | -0.49      | 0.53            | 0.28            | -0.64          | 0.41  | -0.64                 | -0.46                | -0.70                     |                            |                                           |                                           |             |             |                        |                        |
| Proportion dark CO <sub>2</sub> (drought) | 0.67       | -0.45           | -0.14           | 0.78           | -0.63 | 0.56                  | 0.56                 | 0.88                      | -0.85                      |                                           |                                           |             |             |                        |                        |
| Proportion dark CO <sub>2</sub> (watered) | 0.65       | -0.39           | -0.13           | 0.84           | -0.74 | 0.41                  | 0.67                 | 0.83                      | -0.67                      | 0.84                                      |                                           |             |             |                        |                        |
| DeltaH+ (w)                               | 0.37       | -0.17           | -0.12           | 0.69           | -0.48 | 0.33                  | 0.43                 | 0.66                      | -0.76                      | 0.77                                      | 0.77                                      |             |             |                        |                        |
| DeltaH+ (d)                               | 0.40       | -0.10           | 0.14            | 0.55           | -0.64 | 0.45                  | 0.32                 | 0.62                      | -0.63                      | 0.67                                      | 0.69                                      | 0.77        |             |                        |                        |
| Avg. cell size adaxial                    | 0.70       | -0.61           | -0.35           | 0.92           | -0.62 | 0.52                  | 0.57                 | 0.86                      | -0.70                      | 0.79                                      | 0.87                                      | 0.75        | 0.55        |                        |                        |
| Avg. cell size abaxial                    | 0.68       | -0.59           | -0.35           | 0.86           | -0.61 | 0.53                  | 0.58                 | 0.81                      | -0.69                      | 0.71                                      | 0.83                                      | 0.74        | 0.60        | 0.96                   |                        |

**Figure S6** – Uncorrected (below diagonal) and Holm-Bonferroni corrected (above diagonal) p-values for correlations described in Fig. S5.

|                                           | Succulence | Adaxial stomata | Abaxial stomata | Leaf thickness | IAS  | Avg. dist. Major vein | Avg. dist minor vein | Max. dark CO <sub>2</sub> | Max. light CO <sub>2</sub> | Proportion dark CO <sub>2</sub> (watered) | Proportion dark CO <sub>2</sub> (drought) | deltaH+ (w) | deltaH+ (d) | Avg. cell size adaxial | Avg. cell size abaxial |
|-------------------------------------------|------------|-----------------|-----------------|----------------|------|-----------------------|----------------------|---------------------------|----------------------------|-------------------------------------------|-------------------------------------------|-------------|-------------|------------------------|------------------------|
| Succulence                                |            | 0.49            | 0.63            | 0.05           | 1    | 0.22                  | 0.46                 | 0.28                      | 1                          | 0.31                                      | 0.37                                      | 1           | 1           | 0.03                   | 0.06                   |
| Adaxial stomata                           | 0.01       |                 | 0.25            | 1              | 1    | 0.03                  | 1                    | 1                         | 1                          | 1                                         | 1                                         | 1           | 1           | 0.32                   | 0.41                   |
| Abaxial stomata                           | 0.01       | 0               |                 | 1              | 1    | 1                     | 1                    | 1                         | 1                          | 1                                         | 1                                         | 1           | 1           | 1                      | 1                      |
| Leaf thickness                            | 0          | 0.03            | 0.23            |                | 0.04 | 1                     | 0.34                 | 0                         | 0.4                        | 0.03                                      | 0                                         | 0.22        | 1           | 0                      | 0                      |
| IAS                                       | 0.06       | 0.39            | 0.99            | 0              |      | 1                     | 1                    | 0.03                      | 1                          | 0.44                                      | 0.07                                      | 1           | 0.41        | 0.2                    | 0.24                   |
| Avg. dist. major vein                     | 0          | 0               | 0.07            | 0.1            | 0.14 |                       | 1                    | 1                         | 0.41                       | 0.99                                      | 1                                         | 1           | 1           | 0.67                   | 0.65                   |
| Avg. dist minor vein                      | 0.01       | 0.21            | 0.35            | 0.01           | 0.05 | 0.24                  |                      | 0.8                       | 1                          | 1                                         | 0.31                                      | 1           | 1           | 0.37                   | 0.33                   |
| Max. dark CO <sub>2</sub>                 | 0          | 0.09            | 0.35            | 0              | 0    | 0.07                  | 0.02                 |                           | 0.2                        | 0                                         | 0.01                                      | 0.34        | 0.49        | 0                      | 0.01                   |
| Max light CO <sub>2</sub>                 | 0.06       | 0.04            | 0.31            | 0.01           | 0.12 | 0.01                  | 0.07                 | 0                         |                            | 0                                         | 0.28                                      | 0.05        | 0.44        | 0.2                    | 0.21                   |
| Proportion dark CO <sub>2</sub> (drought) | 0          | 0.09            | 0.63            | 0              | 0.01 | 0.02                  | 0.02                 | 0                         | 0                          |                                           | 0.01                                      | 0.04        | 0.31        | 0.03                   | 0.16                   |
| Proportion dark CO <sub>2</sub> (watered) | 0.01       | 0.15            | 0.66            | 0              | 0    | 0.11                  | 0                    | 0                         | 0                          | 0                                         |                                           | 0.04        | 0.22        | 0                      | 0.01                   |
| DeltaH+ (w)                               | 0.16       | 0.54            | 0.68            | 0              | 0.06 | 0.21                  | 0.09                 | 0.01                      | 0                          | 0                                         | 0                                         |             | 0.04        | 0.07                   | 0.08                   |
| DeltaH+ (d)                               | 0.12       | 0.73            | 0.63            | 0.03           | 0.01 | 0.08                  | 0.23                 | 0.01                      | 0.01                       | 0                                         | 0                                         | 0           |             | 1                      | 0.61                   |
| Avg. cell size adaxial                    | 0          | 0.01            | 0.14            | 0              | 0    | 0.02                  | 0.01                 | 0                         | 0                          | 0                                         | 0                                         | 0           | 0.03        |                        | 0                      |
| Avg. cell size abaxial                    | 0          | 0.01            | 0.14            | 0              | 0    | 0.01                  | 0.01                 | 0                         | 0                          | 0                                         | 0                                         | 0           | 0.01        | 0                      |                        |
